# Supplementary material for: White upconversion luminescence in CaF2:Yb3+/Eu3+ powders via the incorporation of Y3+ ions
Source: Royal Society of Chemistry journal article supplement (doi:10.1039/c6cp02849g), 2016-01-01
Supplement: c6cp02849g1.pdf [file c6cp02849g1.pdf]

## Supplementary Information

White upconversion luminescence in  $\text{CaF}_2: \text{Yb}^{3+}/\text{Eu}^{3+}$  powders  
via incorporating  $\text{Y}^{3+}$  ions

Yangyang Li,<sup>a</sup> Junjie Guo,<sup>a</sup> Xiaohui Liu,<sup>a</sup> Tuerxun Aidilibike,<sup>ab</sup> Weiping  
Qin<sup>\*a</sup>

*a. State Key Laboratory on Integrated Optoelectronics, College of Electronic Science and Engineering, Jilin University, Changchun, Jilin 130012, China. E-mail: wpqin@jlu.edu.cn*

*b. Yili Normal University, Electronic and Information Engineering, Yining, Xinjiang 835000, China.*

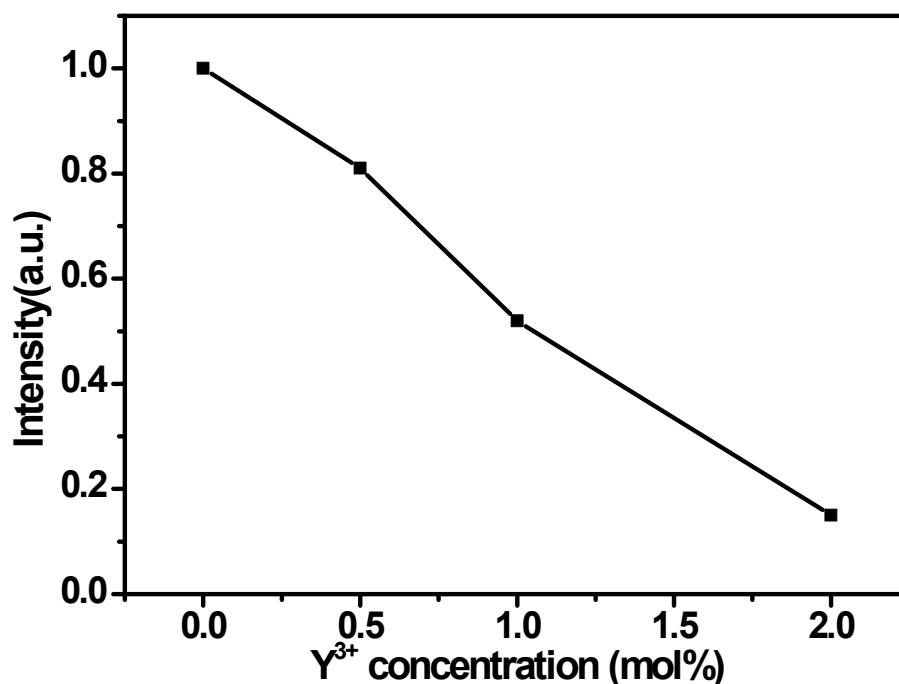

Fig. S1 Variation of the overall emission intensity with changing concentrations of  $\text{Y}^{3+}$  ions.

Fig. S1 shows the absolute emission intensity corresponding to the peak area, a significant drop in the overall intensity is observed with an

increasing concentration of  $Y^{3+}$  ions. When the concentration of  $Y^{3+}$  ions was 0.5%, 1% and 2%, the luminous intensity decreased to 81%, 52% and 15%, respectively.
